# Supplementary material
Source: PubMed Central journal article supplement (PMC11071796)

Figure S2

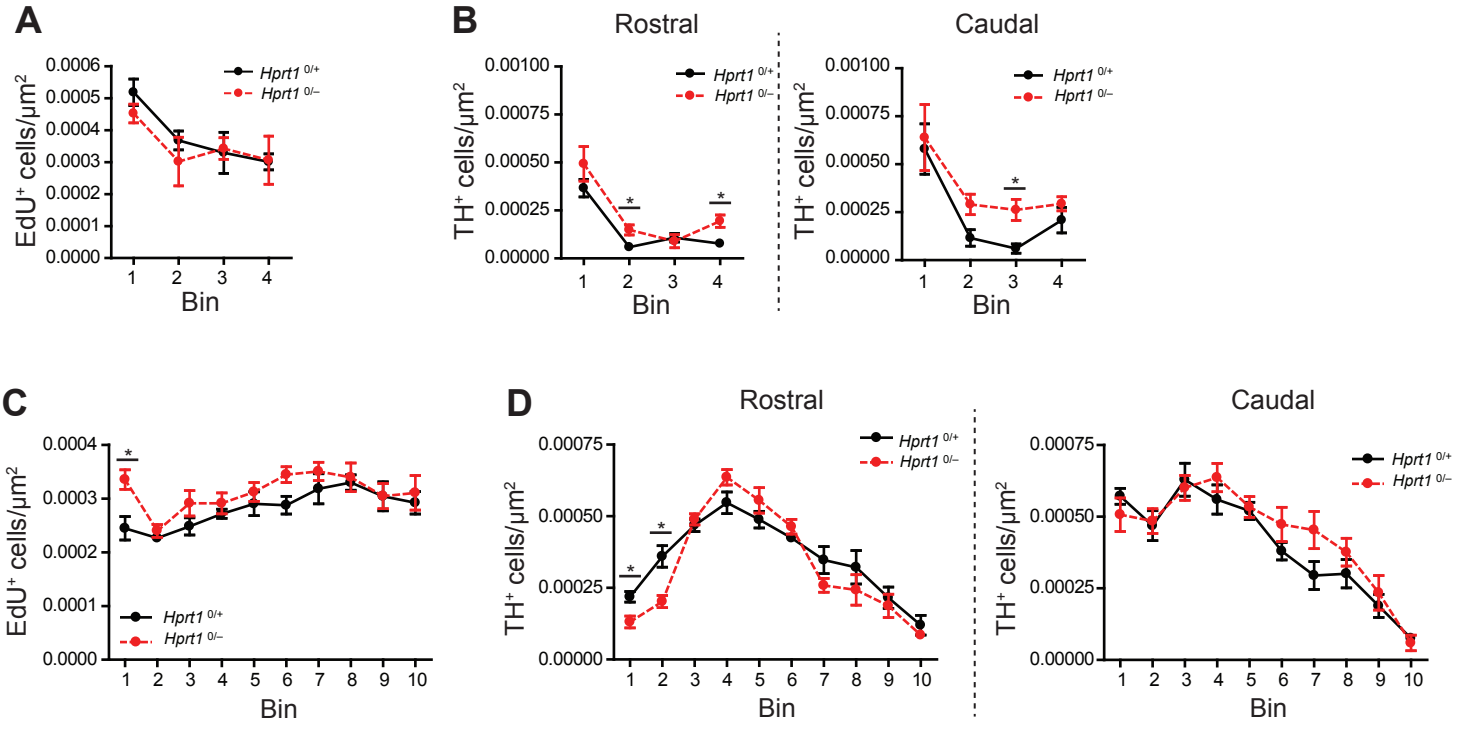

Supplement: 18_2022_4326_MOESM2_ESM.pdf [file 18_2022_4326_MOESM2_ESM.pdf]
